# Supplementary material for: Proteolysis of ToxR is controlled by cysteine‐thiol redox state and bile salts in Vibrio cholerae
Source: PubMed Central journal article supplement (PMC6242745; doi:10.1111/mmi.14125), 2018-10-25
Supplement: MMI-110-796-s001.pdf [file MMI-110-796-s001.pdf]

## Supplemental material

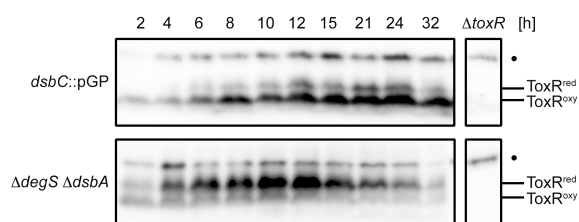

**Fig. S1. The cysteine oxidation and reduction state of ToxR affects protein stability.** Shown are ToxR immunoblots of *V. cholerae dsbC* and *degSdsbA* strains grown in M9 maltose. Immunoblots were performed under standard nonreducing Laemmli buffer conditions utilizing  $\alpha$ -ToxR antiserum. The migration patterns of ToxR<sup>red/oxy</sup> are indicated. (•): Represents a nonspecific cross-reacting background band.

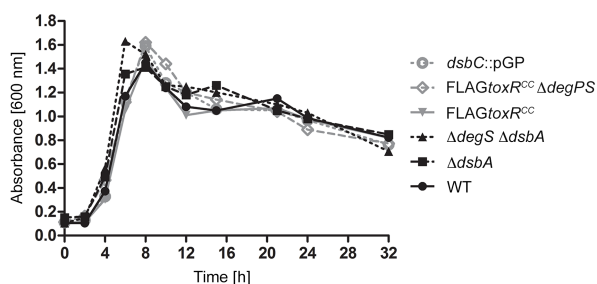

**Fig. S2. Growth of *V. cholerae* WT and mutant cells over 32 h.** Bacterial cultures were adjusted to an optical density at 600 nm of 0.1 and grown in M9 maltose at 37°C for 32 h. Data are connected to Fig. 1 and Fig. S1.

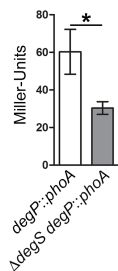

**Fig. S3. Transcription of *degP* is affected in a *degS* knockout mutant.** Shown are reporter gene activities of alkaline phosphatase PhoA (Miller-Units) linked as operon fusions to *degP* in *V. cholerae*. Strains were grown in M9 maltose ON. Data shown are mean and standard deviation of 6 independent samples. The asterisks indicate a statistically significant difference between WT *degP::phoA* and *degS degP::phoA* cells, with P-values by paired t-test (\*):  $P < 0.05$ .

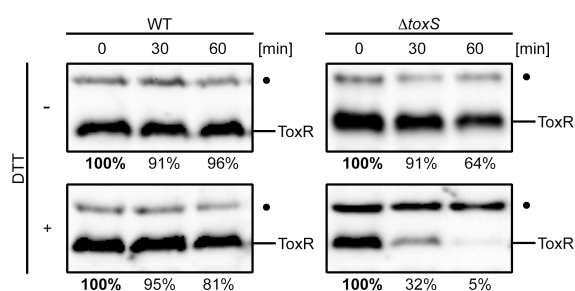

**Fig. S4. Effects of DTT treatment on the redox state and protein stability of ToxR in *V. cholerae* WT and *toxS* mutant.** Representative immunoblots for densitometric analysis of ToxR temporal stability levels in *V. cholerae* WT and *toxS* strains displayed in Fig. 2B. Strains were grown in M9 maltose with or without DTT (+/-) and time points of sampling are indicated. Protein biosynthesis was inhibited by the addition of Cm. 6 or more of such immunoblots were performed under standard reducing Laemmli buffer conditions utilizing  $\alpha$ -ToxR antiserum. ToxR band intensities were readout using Image lab software (BIO-RAD). (•): Represents a nonspecific cross-reacting background band.

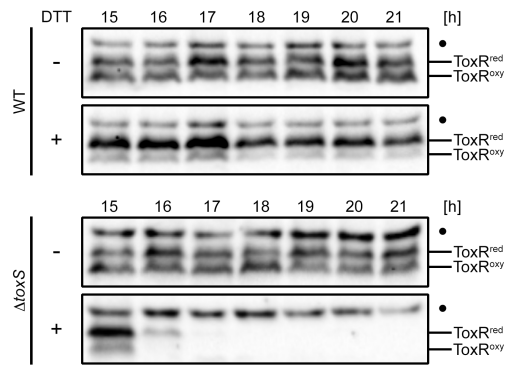

**Fig. S5. Effects of DTT treatment on protein stability of ToxR in *V. cholerae* WT and *toxS* mutant.** ToxR temporal stability levels were measured by immunoblot analysis in WT and *toxS* mutant strains grown in M9 maltose for 15 h, then incubated for another 6 h with or without DTT (+/-). Immunoblots were performed under standard nonreducing Laemmli buffer conditions utilizing  $\alpha$ -ToxR antiserum. The migration patterns of ToxR<sup>red/oxy</sup> are indicated. (•): Represents a nonspecific cross-reacting background band.

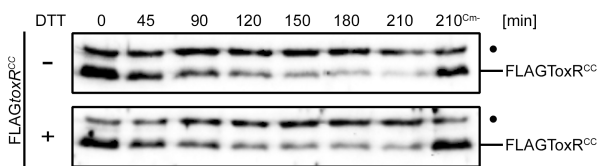

**Fig. S6. FLAGToxR<sup>CC</sup> degradation is not accelerated by DTT.** FLAGToxR<sup>CC</sup> temporal stability levels were measured by immunoblot analysis of *V. cholerae* FLAG*toxR*<sup>CC</sup> grown in M9 maltose with or without DTT (+/-). Protein biosynthesis was inhibited by the addition of Cm. Samples without chloramphenicol (Cm-) served as negative controls. Immunoblots were performed under standard reducing Laemmli buffer conditions utilizing  $\alpha$ -ToxR antiserum. (•): Represents a nonspecific cross-reacting background band.

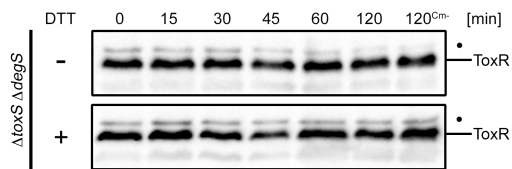

**Fig. S7. Deletion of *degS* rescues  $\text{ToxR}^{\text{red}}$  protein in the absence of *ToxS*.**  $\text{ToxR}$  temporal stability levels were measured by immunoblot analysis in *toxSdegS* mutant strain grown in M9 maltose with or without DTT (+/-). Protein biosynthesis was inhibited by the addition of Cm. Samples without chloramphenicol (Cm-) served as negative controls. Immunoblots were performed under standard nonreducing Laemmli buffer conditions utilizing  $\alpha$ - $\text{ToxR}$  antiserum. The migration patterns of  $\text{ToxR}^{\text{red/oxy}}$  are indicated. (•): Represents a nonspecific cross-reacting background band.

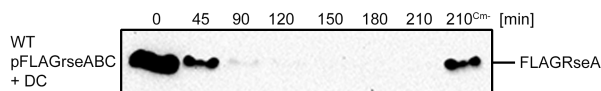

**Fig. S8. Sodium deoxycholate (DC) does not inhibit *DegS* activity.** WT cells harbouring pFLAGrseABC were grown in M9 maltose supplemented with 0.1% DC and subsequently induced with IPTG for 1 h. Protein biosynthesis was inhibited by the addition of Cm. Samples without chloramphenicol (Cm-) served as negative controls. Immunoblots were performed under standard reducing Laemmli buffer conditions utilizing anti-FLAG antibodies to monitor temporal expression levels of FLAGRseA.

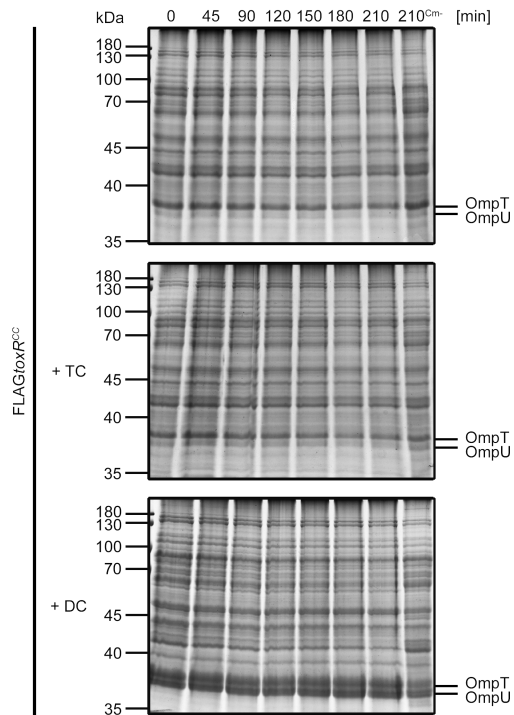

**Fig. S9. Comparative analysis of protein amounts and OmpU/T expression patterns derived from bile salt treated cells.** WCL of *V. cholerae* FLAGtoxR<sup>CC</sup> were analysed by SDS-PAGE and Kang staining as loading controls for immunoblots displayed in Fig. 4. Cells were grown in M9 maltose or media supplemented with 0.1% DC. Protein biosynthesis was inhibited by the addition of Cm and samples without chloramphenicol (Cm-) served as negative controls.

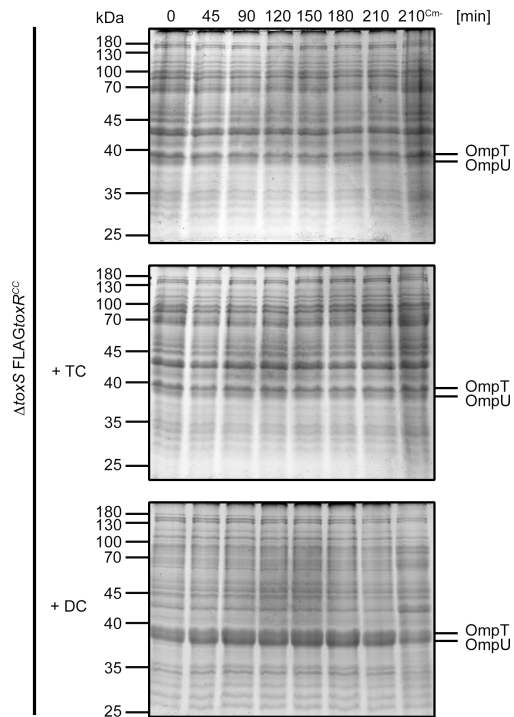

**Fig. S10 Comparative analysis of protein amounts and OmpU/T expression patterns derived from bile salt treated cells.** WCL of *V. cholerae toxS FLAGtoxR<sup>CC</sup>* were analysed by SDS-PAGE and Kang staining as loading controls for immunoblots displayed in Fig. 4. Cells were grown in M9 maltose or media supplemented with 0.1% DC. Protein biosynthesis was inhibited by the addition of Cm and samples without chloramphenicol (Cm-) served as negative controls.
